# Supplementary material
Source: PubMed Central journal article supplement (PMC6038944)
Supplement: NIHMS978337-supplement-Figure_1_and_2.pdf [file NIHMS978337-supplement-Figure_1_and_2.pdf]

# Supplemental Figure 1

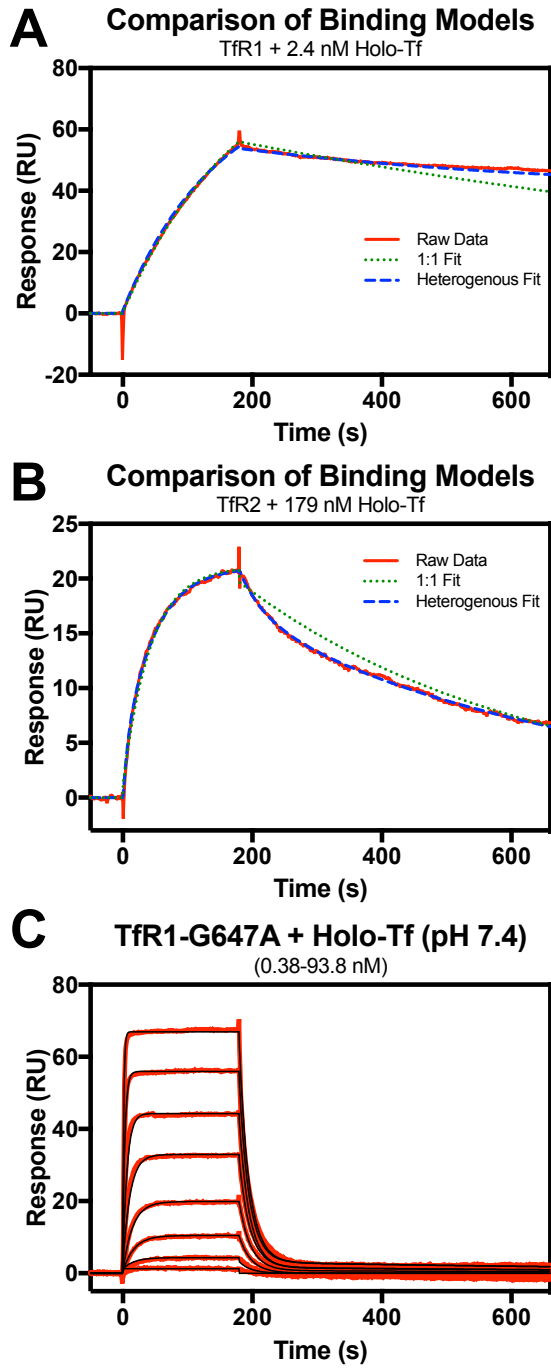

Supplemental Figure 1. The Tf-binding behavior of full-length Tf receptor. Comparison of 1:1 and heterogenous binding models applied to raw surface plasmon resonance data. Representative curves from TfR1 (A) and TfR2 (B) are shown. (C) The interaction of holo-Tf with TfR1-G647A mutation by SPR. ~200 RU's of the receptor were immobilized to the chip surface, followed by sequential injections of 0.38 – 93.8 nM of holo-Tf (2.5-fold dilution series). Reference cell-subtracted binding response data is indicated in red, and heterogenous model fits are shown in black. Extrapolated kinetic constants from the model fits are shown in Table 1.

## Supplemental Figure 2

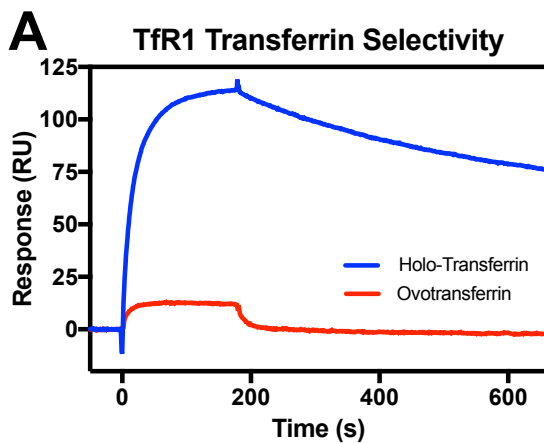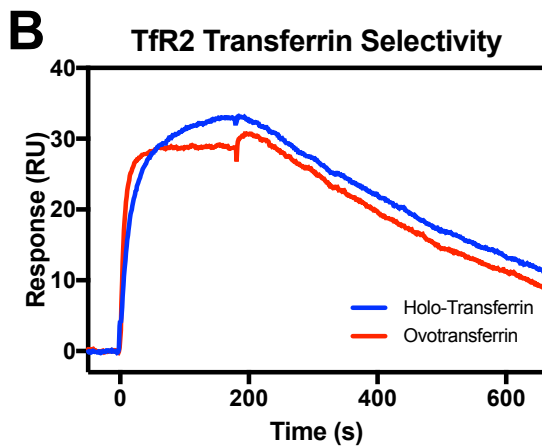

Supplemental Figure 2. The analyte specificity of full-length Tf receptor. (A) SPR binding responses of TfR1 to holo-Tf (37.5 nM) or ovo0Tf (960 nM). (B) SPR binding responses of TfR2 to holo-Tf or ovo-Tf (both at 960 nM). ~200 RU's of the receptor were immobilized to the chip surface, followed by injections of Tf solutions.

Supplemental Table 1. Primers used in transferrin receptor cloning and site-directed mutagenesis.

| <b>pEGFP-C2 Cloning Primers</b>          |                            |                                                 |
|------------------------------------------|----------------------------|-------------------------------------------------|
| TfR1                                     | Forward                    | AGTCCGGCCGGACTCAGATCTCGAGAATGATGGATCAAGCTAGATC  |
|                                          | Reverse                    | ATCCCGGGCCCGCGGTACCGTCGACTTAAAACCTATTGTCAATGTC  |
| TfR2                                     | Forward                    | GGATACTCGAGACTCGTCCCCCGCGGCTCCGAGCGGCTTTGGGGTC  |
|                                          | Reverse                    | GGATAGTCGACTCAGAAGTTGTTATCAATGTTCCAGACA         |
| TfR2-TfR1-HD                             | TfR2(1-636) -<br>Forward   | AGTCCGGCCGGACTCAGATCTCGAGAGAGCGGCTTTGGGGTCTATTC |
|                                          | TfR2(1-636) -<br>Reverse   | TCAATTCAACATCGTGGCTGAGCCGGATG                   |
|                                          | TfR1(605-760) -<br>Forward | CAGCCACGATGTTGAATTGAACCTGGAC                    |
|                                          | TfR1(605-760) -<br>Reverse | ATCCCGGGCCCGCGGTACCGTCGACTTAAAACCTATTGTCAATGTC  |
| <b>Site-Directed Mutagenesis Primers</b> |                            |                                                 |
| TfR1-H318Q                               | Forward                    | TCCCTTCCTTCAATCAGACTCAGTTTCCACCA                |
|                                          | Reverse                    | TGGTGGAAGGAACTGAGTCTGATTGAAGGAAGGGAA            |
| TfR1-E759N                               | Forward                    | TGGGACATTGACAATAACTTTAAGTCGACGGT                |
|                                          | Reverse                    | ACCGTCGACTTAAAAGTTATTGTCAATGTCCCA               |
| TfR2-Q340H                               | Forward                    | TCCCTTCCTTCAATCACACCCAGTTCCTCCCA                |
|                                          | Reverse                    | TGGAGGGAAGGAACTGGGTGTGATTGAAGGAAGGGAA           |
| TfR2-N800E                               | Forward                    | TGGAACATTGATAACGAGTTCTGAGTCGACGGTACC            |
|                                          | Reverse                    | GGTACCGTCGACTCAGAAGTTCGTTATCAATGTTCCA           |

## AUTHOR INFORMATION

### Corresponding Author

\*Caroline A. Enns, Oregon Health & Science University, Department of Cell, Cancer and

Developmental Biology, 3181 SW Sam Jackson Park Road, Portland, Oregon, ennsca@ohsu.edu
